# Supplementary material
Source: PubMed Central journal article supplement (PMC3351362)
Supplement: supp_M111.325316_jbc.M111.325316-1.pdf [file supp_M111.325316_jbc.M111.325316-1.pdf]

## Supplemental Tables

**TableS1:** Oligonucleotide primers used for vector construction.

|                               |                                                  |                               |                                               |
|-------------------------------|--------------------------------------------------|-------------------------------|-----------------------------------------------|
| McFADX_XmaI_F                 | tccc <b><u>cccgga</u></b> tggggggcagaggagctattgg | McFADX_XhoI_R                 | ccg <b><u>ctcgag</u></b> tcagagctgtgtgtaccag  |
| AThFad2_XmaI_F                | tccc <b><u>cccgga</u></b> tgggtgcaggtggaag       | AThFad2_XhoI_R                | ccg <b><u>ctcgag</u></b> ctataactattgtgtacc   |
| Chimera1_F                    | cactccaacaccggatccctcgaaag                       | Chimera1_R                    | ctttcagggatccgggtgtggagtg                     |
| Chimera2_F                    | catctccggccggccgtatgacggg                        | Chimera2_R                    | cccgtcatacggccggccggagatg                     |
| Chimera3_F                    | gtacaggatcgagctgcacaaggg                         | Chimera3_R                    | cccttgtcagctgcgacctgtaca                      |
| Chimera4_F                    | gacacgcacgtggctcatcacctgtt                       | Chimera4_R                    | caggtgatgagccacgtgcgtgcc                      |
| Chimera5_F                    | ccctcgtcttttctaccttctttcc                        | Chimera5_R                    | gaaggtaggaaaagagcagggattg                     |
| Chimera6_F                    | cctctcttacctggcctggcccc                          | Chimera6_R                    | gggccaggccaggtaagagagaggc                     |
| Chimera7_F                    | gcgactaccaattgtagacgacg                          | Chimera7_R                    | gtcgtctaccaattgtagtcgctg                      |
| Chimera8_F                    | cattccaacacttcatcctggaccgg                       | Chimera8_R                    | gtccacggatgaagtgtggaatgg                      |
| FADX <sub>6</sub> mut_F       | gtactaccggcatctgggtcatcgctcacgag                 | FADX <sub>6</sub> mut_R       | ggcggtagtagcagccctgacagggccagtaaaaggccaggccag |
| FADX <sub>6</sub> mut-V97L_F  | cctggcctggccccgttactggcctgtcag                   | FADX <sub>6</sub> mut-V97L_R  | ctgacaggcccagtaaacgggccaggccagg               |
| FADX <sub>6</sub> mut-F100A_F | gccccttactggttctgtagggctgcgtac                   | FADX <sub>6</sub> mut-F100A_R | gtacgcagccctgacagaaccagtaaaaggggc             |
| FADX <sub>6</sub> mut-A104C_F | ggcctgtcagggccgctactaccggcatc                    | FADX <sub>6</sub> mut-A104C_R | gatgccggtagtagcggccctgacaggcc                 |
| FADX <sub>6</sub> mut-M109I_F | gtactaccggcatgtgggtcatcgctcac                    | FADX <sub>6</sub> mut-M109I_R | gtgagcgtgacccacatgccggtgagtag                 |
| FADX <sub>6</sub> mut-G111V_F | ctcaccggcatctggggcatcgctcacgag                   | FADX <sub>6</sub> mut-G111V_R | ctcgtgagcgtgccccagatgccggtgag                 |
| FADX <sub>6</sub> mut-D115E_F | ggtcatcgctcagactcgccaccacgc                      | FADX <sub>6</sub> mut-D115E_R | gcgtggtggccagctgtgagcgtgacc                   |
| McG111A_F                     | caccggcatgtggccatcgctcagactg                     | McG111A_R                     | cagtcgtgagcgtgccccacatgccggtg                 |
| McG111V_F                     | caccggcatgtgggtcatcgctcagactgc                   | McG111V_R                     | gcagtcgtgagcgtgacccacatgccggtg                |
| McG111L_F                     | caccggcatgtggctcatcgctcagactg                    | McG111L_R                     | cagtcgtgagcgtgagccacatgccggtg                 |
| McG111F_F                     | caccggcatgtggttcatcgctcagactg                    | McG111F_R                     | cagtcgtgagcgtgagccacatgccggtg                 |
| McG111A/D115E_F               | caccggcatgtggccatcgctcagactg                     | McG111A/D115E_R               | cactcgtgagcgtgccccacatgccggtg                 |
| McG111V/D115E_F               | caccggcatgtgggtcatcgctcagactg                    | McG111V/D115E_R               | cactcgtgagcgtgacccacatgccggtg                 |
| McG111L/D115E_F               | caccggcatgtggctcatcgctcagactg                    | McG111L/D115E_R               | cactcgtgagcgtgagccacatgccggtg                 |
| McG111F/D115E_F               | caccggcatgtggttcatcgctcagactg                    | McG111F/D115E_R               | cactcgtgagcgtgagccacatgccggtg                 |

F: forward; R: reverse; restriction sites are in bold and underlined.

**Table S2:** Fatty acid composition of untransformed and transformed *fad3/fae1* Arabidopsis seeds by GC-MS analyses of FAMES. Values represent means  $\pm$  SD of at least three independent analyses.

| construct      | 16:0           | 18:0          | 18:1           | 18:2 (c,t)    | 18:2 (c,c)     | 18:3          | 20:0          | 20:1          | punicic       | $\alpha$ -ESA <sup>a</sup> | $\beta$ -ESA <sup>a</sup> | Total ESA <sup>a</sup> |
|----------------|----------------|---------------|----------------|---------------|----------------|---------------|---------------|---------------|---------------|----------------------------|---------------------------|------------------------|
| untransformed  | 10.2 $\pm$ 0.5 | 6.4 $\pm$ 0.4 | 33.2 $\pm$ 0.6 | 0             | 46.6 $\pm$ 0.6 | 1.2 $\pm$ 0.3 | 1.2 $\pm$ 0.1 | 0.4 $\pm$ 0.1 | 0             | 0                          | 0                         | 0                      |
| Wild-type FADX | 8.1 $\pm$ 0.6  | 5.1 $\pm$ 0.5 | 55.7 $\pm$ 1.8 | 1.9 $\pm$ 0.8 | 16.4 $\pm$ 2.4 | 0.5 $\pm$ 0.1 | 1.2 $\pm$ 0.1 | 0.6 $\pm$ 0.1 | 0.2 $\pm$ 0.1 | 7.6 $\pm$ 0.9              | 2.1 $\pm$ 1.1             | 9.9 $\pm$ 0.5          |
| Wild-type FAD2 | 12.8 $\pm$ 2.2 | 6.0 $\pm$ 0.2 | 21.5 $\pm$ 2.1 | 0.3 $\pm$ 0.3 | 55.6 $\pm$ 1.6 | 1.7 $\pm$ 0.4 | 1.2 $\pm$ 0.8 | 0.7 $\pm$ 0.3 | 0             | 0                          | 0                         | 0                      |
| Chimera1       | 11 $\pm$ 1.5   | 5.4 $\pm$ 0.2 | 35.1 $\pm$ 4.5 | 2.7 $\pm$ 0.4 | 40.3 $\pm$ 3.5 | 1.6 $\pm$ 0.6 | 1.1 $\pm$ 0.2 | 0.3 $\pm$ 0.1 | 0.1 $\pm$ 0.1 | 1.9 $\pm$ 0.3              | 0.6 $\pm$ 0.1             | 2.6 $\pm$ 0.4          |
| Chimera2       | 12.4 $\pm$ 1.2 | 5.0 $\pm$ 0.3 | 30.6 $\pm$ 1.4 | 0.6 $\pm$ 0.4 | 47.7 $\pm$ 2.1 | 1.7 $\pm$ 0.6 | 1.0 $\pm$ 0.1 | 0.2 $\pm$ 0.2 | 0             | 0.8 $\pm$ 0.1              | 0                         | 0.8 $\pm$ 0.1          |
| Chimera3       | 9.9 $\pm$ 0.8  | 4.7 $\pm$ 3.3 | 33.7 $\pm$ 2.7 | 3.1 $\pm$ 1.0 | 41.8 $\pm$ 4.0 | 1.2 $\pm$ 0.7 | 0.8 $\pm$ 0.5 | 0.1 $\pm$ 0   | 0.2 $\pm$ 0.1 | 3.3 $\pm$ 2.4              | 1.0 $\pm$ 0.6             | 4.5 $\pm$ 2.7          |
| Chimera4       | 9.9 $\pm$ 0.9  | 4.1 $\pm$ 0.5 | 43.5 $\pm$ 0.9 | 0.5 $\pm$ 0   | 31.2 $\pm$ 3.1 | 1.4 $\pm$ 0.5 | 1.1 $\pm$ 0.2 | 0.5 $\pm$ 0.1 | 0.2 $\pm$ 0.1 | 5.4 $\pm$ 0.9              | 1.9 $\pm$ 0.9             | 7.5 $\pm$ 1.4          |
| Chimera5       | 9.9 $\pm$ 1.5  | 4.8 $\pm$ 0.9 | 49.1 $\pm$ 3.6 | 2.4 $\pm$ 0.2 | 18.9 $\pm$ 2.2 | 1.1 $\pm$ 0.5 | 1.1 $\pm$ 0.2 | 0.5 $\pm$ 0.1 | 0.1 $\pm$ 0.1 | 9.0 $\pm$ 2.5              | 2.3 $\pm$ 0.2             | 11.4 $\pm$ 2.5         |
| Chimera6       | 8.7 $\pm$ 1.5  | 4.5 $\pm$ 0.8 | 51.3 $\pm$ 6.8 | 2.9 $\pm$ 0.7 | 18.8 $\pm$ 0.9 | 0.6 $\pm$ 0.4 | 1.0 $\pm$ 0.7 | 0.4 $\pm$ 0.3 | 0.1 $\pm$ 0.1 | 7.9 $\pm$ 3.5              | 3.4 $\pm$ 1.6             | 11.4 $\pm$ 4.1         |
| Chimera7       | 7.1 $\pm$ 0.7  | 4.6 $\pm$ 0.7 | 48.2 $\pm$ 0.5 | 0.5 $\pm$ 0.1 | 18.1 $\pm$ 1.7 | 1.7 $\pm$ 0.4 | 0.8 $\pm$ 0.1 | 0.7 $\pm$ 0.3 | 8.9 $\pm$ 0.4 | 7.8 $\pm$ 0.4              | 0.3 $\pm$ 0.2             | 17.0 $\pm$ 0.8         |
| Chimera8       | 13.4 $\pm$ 0.8 | 5.0 $\pm$ 1.8 | 35.1 $\pm$ 5.2 | 0.1 $\pm$ 0.1 | 40.7 $\pm$ 4.2 | 1.2 $\pm$ 0.9 | 0.8 $\pm$ 0.4 | 0.3 $\pm$ 0.1 | 0             | 2.4 $\pm$ 1.6              | 0.9 $\pm$ 0.5             | 3.5 $\pm$ 2.1          |

<sup>a</sup>Eleostearic acid

**Table S3:** Fatty acid composition of untransformed and transformed *fad2/fae1* Arabidopsis seeds by GC-MS analyses of FAMES. Values represent means  $\pm$  SD of at least three independent analyses.

| construct      | 16:0           | 18:0          | 18:1           | 18:2<br>(c,t) | 18:2<br>(c,c)  | 18:3           | 20:0          | 20:1          | punicic       | $\alpha$ -ESA <sup>a</sup> | $\beta$ -ESA <sup>a</sup> | Total ESA <sup>a</sup> |
|----------------|----------------|---------------|----------------|---------------|----------------|----------------|---------------|---------------|---------------|----------------------------|---------------------------|------------------------|
| untransformed  | 7.5 $\pm$ 0.8  | 4.5 $\pm$ 0.9 | 80.7 $\pm$ 2.6 | 0.1 $\pm$ 0.1 | 0.6 $\pm$ 0.2  | 2.5 $\pm$ 0.5  | 1.4 $\pm$ 0.2 | 0.9 $\pm$ 0.1 | 0             | 0                          | 0                         | 0                      |
| Wild-type FADX | 7.7 $\pm$ 0.4  | 4.4 $\pm$ 0.1 | 77.8 $\pm$ 0.6 | 3.0 $\pm$ 0.2 | 1.7 $\pm$ 0.3  | 1.0 $\pm$ 0.1  | 1.3 $\pm$ 0.1 | 0.8 $\pm$ 0   | 0             | 1.3 $\pm$ 0.3              | 0.2 $\pm$ 0.1             | 1.5 $\pm$ 0.3          |
| Wild-type FAD2 | 10.7 $\pm$ 0.9 | 5.0 $\pm$ 1.0 | 26.0 $\pm$ 2.7 | 0             | 43.7 $\pm$ 1.1 | 12.1 $\pm$ 1.6 | 1.1 $\pm$ 0.3 | 0.3 $\pm$ 0.1 | 0             | 0                          | 0                         | 0                      |
| Chimera1       | 8.3 $\pm$ 0.9  | 4.3 $\pm$ 0.2 | 62.1 $\pm$ 5.0 | 4.0 $\pm$ 0.8 | 11.3 $\pm$ 1.9 | 6.6 $\pm$ 0.6  | 1.3 $\pm$ 0.1 | 0.9 $\pm$ 0.2 | 0             | 0.2 $\pm$ 0.3              | 0                         | 0.2 $\pm$ 0.3          |
| Chimera2       | 7.9 $\pm$ 0.4  | 3.4 $\pm$ 0.1 | 82.2 $\pm$ 2.5 | 0.2 $\pm$ 0.1 | 1.0 $\pm$ 0.2  | 2.3 $\pm$ 0.2  | 1.1 $\pm$ 0.1 | 0.7 $\pm$ 0.3 | 0             | 0                          | 0                         | 0                      |
| Chimera3       | 8.1 $\pm$ 1.3  | 3.9 $\pm$ 0.3 | 63.9 $\pm$ 5.3 | 5.7 $\pm$ 0.6 | 10.5 $\pm$ 1.7 | 4.3 $\pm$ 0.5  | 1.2 $\pm$ 0.1 | 0.8 $\pm$ 0.1 | 0             | 0.6 $\pm$ 0.5              | 0.2 $\pm$ 0.2             | 0.8 $\pm$ 0.7          |
| Chimera4       | 7.2 $\pm$ 0.4  | 3.8 $\pm$ 0.9 | 81.5 $\pm$ 1.8 | 1.7 $\pm$ 0.2 | 0.9 $\pm$ 0.1  | 1.3 $\pm$ 0.2  | 1.2 $\pm$ 0.2 | 1.0 $\pm$ 0.2 | 0             | 0                          | 0                         | 0                      |
| Chimera5       | 7.7 $\pm$ 0.9  | 3.8 $\pm$ 0.7 | 77.3 $\pm$ 3.8 | 4.0 $\pm$ 1.0 | 1.8 $\pm$ 0.4  | 1.2 $\pm$ 0.2  | 1.3 $\pm$ 0.1 | 1.0 $\pm$ 0.2 | 0             | 1.4 $\pm$ 0.4              | 0.2 $\pm$ 0.1             | 1.6 $\pm$ 0.5          |
| Chimera6       | 7.5 $\pm$ 0.3  | 3.8 $\pm$ 0.4 | 76.3 $\pm$ 0.7 | 4.5 $\pm$ 0.6 | 1.9 $\pm$ 0.1  | 1.1 $\pm$ 0.2  | 1.3 $\pm$ 0.1 | 1.0 $\pm$ 0.1 | 0             | 1.8 $\pm$ 0.4              | 0.2 $\pm$ 0.1             | 2.0 $\pm$ 0.4          |
| Chimera7       | 6.7 $\pm$ 0.5  | 3.9 $\pm$ 0.2 | 70.6 $\pm$ 3.7 | 0.4 $\pm$ 0.1 | 5.9 $\pm$ 0.5  | 1.5 $\pm$ 0.1  | 1.4 $\pm$ 0.2 | 1.1 $\pm$ 0.1 | 3.9 $\pm$ 0.9 | 3.0 $\pm$ 1.5              | 1.0 $\pm$ 0.2             | 7.9 $\pm$ 2.0          |
| Chimera8       | 8.8 $\pm$ 0.9  | 3.9 $\pm$ 0.7 | 72.6 $\pm$ 4.1 | 0.2 $\pm$ 0.1 | 6.5 $\pm$ 0.8  | 4.9 $\pm$ 1.3  | 1.3 $\pm$ 0.4 | 0.9 $\pm$ 0.1 | 0             | 0                          | 0                         | 0                      |

<sup>a</sup>Eleostearic acid

**Table S4:** Fatty acid composition of untransformed and transformed *fad3/fae1* Arabidopsis seeds by GC-MS analyses of FAMES. Values represent means  $\pm$  SD of at least three independent analyses.

| construct                   | 16:0           | 18:0          | 18:1           | 18:2<br>(c,t) | 18:2<br>(c,c)  | 18:3          | 20:0          | 20:1          | punicic        | $\alpha$ -ESA <sup>a</sup> | $\beta$ -ESA <sup>a</sup> | Total<br>ESA <sup>a</sup> |
|-----------------------------|----------------|---------------|----------------|---------------|----------------|---------------|---------------|---------------|----------------|----------------------------|---------------------------|---------------------------|
| untransformed               | 10.2 $\pm$ 0.5 | 6.4 $\pm$ 0.4 | 33.2 $\pm$ 0.6 | 0             | 46.6 $\pm$ 0.6 | 1.2 $\pm$ 0.3 | 0.4 $\pm$ 0.1 | 1.2 $\pm$ 0.1 | 0              | 0                          | 0                         | 0                         |
| Wild-typeFADX               | 8.1 $\pm$ 0.6  | 5.1 $\pm$ 0.5 | 55.7 $\pm$ 1.8 | 1.9 $\pm$ 0.8 | 16.4 $\pm$ 2.4 | 0.5 $\pm$ 0.1 | 1.2 $\pm$ 0.1 | 0.6 $\pm$ 0.1 | 0.2 $\pm$ 0.1  | 7.7 $\pm$ 0.9              | 2.1 $\pm$ 1.1             | 9.9 $\pm$ 0.5             |
| FADX <sub>6</sub> mut       | 9.4 $\pm$ 0.5  | 3.9 $\pm$ 0.2 | 42.7 $\pm$ 3.2 | 0.5 $\pm$ 0   | 19.4 $\pm$ 0.6 | 0.9 $\pm$ 0.1 | 1.3 $\pm$ 0.1 | 0.6 $\pm$ 0.1 | 9.5 $\pm$ 1.1  | 9.5 $\pm$ 0.9              | 1.1 $\pm$ 0.1             | 20.1 $\pm$ 2.0            |
| FADX <sub>6</sub> mut-V97L  | 8.2 $\pm$ 0.4  | 4.3 $\pm$ 0.4 | 47.1 $\pm$ 0.7 | 0.5 $\pm$ 0.1 | 19.9 $\pm$ 1.5 | 0.7 $\pm$ 0.1 | 1.4 $\pm$ 0.2 | 0.6 $\pm$ 0.1 | 7.3 $\pm$ 0.8  | 7.7 $\pm$ 0.7              | 0.9 $\pm$ 0.1             | 15.8 $\pm$ 1.4            |
| FADX <sub>6</sub> mut-F100A | 8.9 $\pm$ 0.6  | 3.9 $\pm$ 0.1 | 45.8 $\pm$ 3.5 | 0.5 $\pm$ 0.1 | 19.5 $\pm$ 0.7 | 0.8 $\pm$ 0.1 | 1.2 $\pm$ 0.1 | 0.7 $\pm$ 0   | 8.9 $\pm$ 1.2  | 8.2 $\pm$ 1                | 0.7 $\pm$ 0.3             | 17.8 $\pm$ 2.2            |
| FADX <sub>6</sub> mut-A104C | 8.7 $\pm$ 0.3  | 4.3 $\pm$ 0.5 | 45.2 $\pm$ 0.9 | 0.4 $\pm$ 0   | 20.5 $\pm$ 0.8 | 0.8 $\pm$ 0.1 | 1.3 $\pm$ 0.2 | 0.6 $\pm$ 0.1 | 7.8 $\pm$ 0.9  | 8.9 $\pm$ 0.6              | 0.8 $\pm$ 0.4             | 17.2 $\pm$ 1.2            |
| FADX <sub>6</sub> mut-M109I | 9.2 $\pm$ 0.7  | 4.0 $\pm$ 0.6 | 44.3 $\pm$ 1.1 | 0.5 $\pm$ 0   | 18.7 $\pm$ 0.2 | 0.7 $\pm$ 0.1 | 1.3 $\pm$ 0.1 | 0.6 $\pm$ 0   | 9.7 $\pm$ 0.4  | 8.6 $\pm$ 0.2              | 0.9 $\pm$ 0.5             | 19.2 $\pm$ 0.4            |
| FADX <sub>6</sub> mut-G111V | 8.0 $\pm$ 0.4  | 3.7 $\pm$ 0.1 | 51.4 $\pm$ 1   | 1.2 $\pm$ 0.3 | 21.0 $\pm$ 1.9 | 0.7 $\pm$ 0   | 1.2 $\pm$ 0.1 | 0.6 $\pm$ 0.1 | 0              | 10.7 $\pm$ 0.4             | 0.8 $\pm$ 0.1             | 11.5 $\pm$ 0.3            |
| FADX <sub>6</sub> mut-D115E | 7.9 $\pm$ 0.3  | 3.8 $\pm$ 0.2 | 49.7 $\pm$ 2.3 | 1.4 $\pm$ 0.1 | 19.2 $\pm$ 1.3 | 0.7 $\pm$ 0.1 | 1.1 $\pm$ 0.1 | 0.6 $\pm$ 0   | 2.1 $\pm$ 0.5  | 12.0 $\pm$ 2.4             | 0.9 $\pm$ 0.2             | 15.0 $\pm$ 2.6            |
| G111A                       | 8.9 $\pm$ 0.2  | 4.3 $\pm$ 0.2 | 55.4 $\pm$ 0.8 | 2.1 $\pm$ 0.7 | 17.2 $\pm$ 1.1 | 0.7 $\pm$ 0.2 | 1.2 $\pm$ 0.2 | 0.5 $\pm$ 0.2 | 0.1 $\pm$ 0.1  | 6.4 $\pm$ 1.9              | 2.4 $\pm$ 0.7             | 8.9 $\pm$ 1.3             |
| G111V                       | 8.5 $\pm$ 0.2  | 4.4 $\pm$ 0.3 | 44.1 $\pm$ 0.7 | 1.6 $\pm$ 0.2 | 16.9 $\pm$ 1.3 | 0.7 $\pm$ 0   | 1.5 $\pm$ 0.1 | 0.7 $\pm$ 0   | 2.8 $\pm$ 0.4  | 16.1 $\pm$ 0.4             | 1.5 $\pm$ 0.6             | 20.4 $\pm$ 1.1            |
| G111L                       | 9.4 $\pm$ 0.3  | 3.8 $\pm$ 0.1 | 50.2 $\pm$ 2.0 | 0.9 $\pm$ 0.3 | 27.4 $\pm$ 1.3 | 0.8 $\pm$ 0.1 | 1.1 $\pm$ 0.1 | 0.5 $\pm$ 0.1 | 0.1 $\pm$ 0.2  | 4.2 $\pm$ 1.7              | 1.2 $\pm$ 0.5             | 5.5 $\pm$ 1.4             |
| G111F                       | 9.6 $\pm$ 0.6  | 4.0 $\pm$ 0.2 | 47.2 $\pm$ 2.0 | 1.0 $\pm$ 0.2 | 29.2 $\pm$ 2.1 | 1.3 $\pm$ 0.1 | 1.4 $\pm$ 0.1 | 0.9 $\pm$ 0.2 | 0.2 $\pm$ 0.1  | 5.2 $\pm$ 0.4              | 0.3 $\pm$ 0.1             | 5.7 $\pm$ 0.4             |
| D115E                       | 7.6 $\pm$ 0.5  | 3.9 $\pm$ 0.3 | 56.2 $\pm$ 1.5 | 1.7 $\pm$ 0.3 | 17.4 $\pm$ 0.7 | 0.7 $\pm$ 0.1 | 1.3 $\pm$ 0.4 | 0.6 $\pm$ 0.1 | 0.2 $\pm$ 0.1  | 8.8 $\pm$ 0.1              | 0.5 $\pm$ 0.3             | 9.6 $\pm$ 0.4             |
| G111A/D115E                 | 7.9 $\pm$ 0.5  | 4.1 $\pm$ 0.2 | 55.3 $\pm$ 0.3 | 1.3 $\pm$ 0.7 | 19.1 $\pm$ 1.6 | 0.7 $\pm$ 0.2 | 1.3 $\pm$ 0.1 | 0.7 $\pm$ 0.1 | 0              | 8.8 $\pm$ 0.6              | 0.8 $\pm$ 0.2             | 9.6 $\pm$ 0.8             |
| G111V/D115E                 | 8.1 $\pm$ 1.4  | 4.3 $\pm$ 0.3 | 43.8 $\pm$ 3.1 | 0.5 $\pm$ 0.1 | 18.8 $\pm$ 1.5 | 0.6 $\pm$ 0.2 | 1.5 $\pm$ 0.4 | 0.6 $\pm$ 0.1 | 10.5 $\pm$ 2.0 | 9.7 $\pm$ 1.4              | 1.0 $\pm$ 0.3             | 21.2 $\pm$ 3.2            |
| G111L/D115E                 | 9.4 $\pm$ 0.7  | 4.3 $\pm$ 0.3 | 46.6 $\pm$ 2.3 | 1.0 $\pm$ 0.4 | 29.8 $\pm$ 1.1 | 1.1 $\pm$ 0.2 | 1.4 $\pm$ 0.2 | 0.9 $\pm$ 0.1 | 1.3 $\pm$ 0.2  | 3.7 $\pm$ 0.4              | 0.6 $\pm$ 0.1             | 5.6 $\pm$ 0.5             |
| G111F/D115E                 | 9.6 $\pm$ 0.6  | 4.0 $\pm$ 0.2 | 47.2 $\pm$ 2.0 | 1.0 $\pm$ 0.2 | 29.2 $\pm$ 2.1 | 1.3 $\pm$ 0.1 | 1.4 $\pm$ 0.1 | 0.9 $\pm$ 0.2 | 0.2 $\pm$ 0.1  | 5.2 $\pm$ 0.4              | 0.3 $\pm$ 0.1             | 5.7 $\pm$ 0.4             |

<sup>a</sup>Eleostearic acid

**Table S5:** Fatty acid composition of untransformed and transformed *fad2/fae1* Arabidopsis seeds by GC-MS analyses of FAMES. Values represent means  $\pm$  SD of at least three independent analyses.

| construct                   | 16:0          | 18:0          | 18:1           | 18:2<br>(c,t) | 18:2<br>(c,c) | 18:3          | 20:0          | 20:1          | punicic       | $\alpha$ -ESA <sup>a</sup> | $\beta$ -ESA <sup>a</sup> | Total<br>ESA <sup>a</sup> |
|-----------------------------|---------------|---------------|----------------|---------------|---------------|---------------|---------------|---------------|---------------|----------------------------|---------------------------|---------------------------|
| untransformed               | 7.5 $\pm$ 0.8 | 4.5 $\pm$ 0.9 | 80.6 $\pm$ 2.6 | 0.1 $\pm$ 0.1 | 0.6 $\pm$ 0.2 | 2.5 $\pm$ 0.5 | 1.4 $\pm$ 0.2 | 0.9 $\pm$ 0.1 | 0             | 0                          | 0                         | 0                         |
| Wild-type FADX              | 7.7 $\pm$ 0.4 | 4.4 $\pm$ 0.1 | 77.8 $\pm$ 0.6 | 3.0 $\pm$ 0.2 | 1.7 $\pm$ 0.3 | 1.0 $\pm$ 0.1 | 1.3 $\pm$ 0.1 | 0.8 $\pm$ 0   | 0             | 1.3 $\pm$ 0.3              | 0.2 $\pm$ 0.1             | 1.5 $\pm$ 0.3             |
| FADX <sub>6</sub> mut       | 6.2 $\pm$ 0.3 | 3.2 $\pm$ 0.2 | 70.5 $\pm$ 1.4 | 0.5 $\pm$ 0.1 | 7.1 $\pm$ 0.6 | 1.8 $\pm$ 0.1 | 1.1 $\pm$ 0.1 | 0.9 $\pm$ 0   | 4.1 $\pm$ 0.9 | 3.3 $\pm$ 0.1              | 0.4 $\pm$ 0.1             | 7.8 $\pm$ 0.9             |
| FADX <sub>6</sub> mut-V97L  | 4.8 $\pm$ 0.8 | 4.9 $\pm$ 1.7 | 61.9 $\pm$ 8.3 | 1.4 $\pm$ 1.1 | 6.1 $\pm$ 0.4 | 1.7 $\pm$ 0.2 | 2.7 $\pm$ 1.1 | 1.6 $\pm$ 0.2 | 5.3 $\pm$ 0.7 | 5.1 $\pm$ 0.1              | 0.7 $\pm$ 0.2             | 11.0 $\pm$ 0.8            |
| FADX <sub>6</sub> mut-F100A | 6.0 $\pm$ 0.5 | 3.3 $\pm$ 0   | 69.0 $\pm$ 2.7 | 0.5 $\pm$ 0.1 | 6.6 $\pm$ 0.7 | 1.8 $\pm$ 0.2 | 1.4 $\pm$ 0.2 | 1 $\pm$ 0.6   | 4.9 $\pm$ 1.2 | 4 $\pm$ 0.5                | 0.5 $\pm$ 0.2             | 9.4 $\pm$ 1.7             |
| FADX <sub>6</sub> mut-A104C | 6.4 $\pm$ 0.2 | 3.3 $\pm$ 0.4 | 68.5 $\pm$ 0.2 | 0.5 $\pm$ 0.1 | 6.7 $\pm$ 0.5 | 1.8 $\pm$ 0.2 | 1.3 $\pm$ 0.3 | 1 $\pm$ 0.1   | 4.5 $\pm$ 0.2 | 4.3 $\pm$ 0.2              | 0.6 $\pm$ 0.1             | 9.4 $\pm$ 0.2             |
| FADX <sub>6</sub> mut-M109I | 7.3 $\pm$ 1.7 | 5.6 $\pm$ 3.2 | 63.1 $\pm$ 5.2 | 0.6 $\pm$ 0.1 | 5.9 $\pm$ 0.4 | 1.5 $\pm$ 0.2 | 0.3 $\pm$ 0.5 | 1.1 $\pm$ 0.1 | 5.7 $\pm$ 1.1 | 3.5 $\pm$ 0.6              | 0.5 $\pm$ 0.1             | 9.7 $\pm$ 1.8             |
| FADX <sub>6</sub> mut-G111V | 4.7 $\pm$ 0.6 | 3.2 $\pm$ 0.4 | 80.4 $\pm$ 2.3 | 2.6 $\pm$ 0.3 | 2.1 $\pm$ 0.2 | 1.9 $\pm$ 0.2 | 1.6 $\pm$ 0.4 | 1.5 $\pm$ 0.1 | 0             | 2.3 $\pm$ 0.7              | 0.1 $\pm$ 0               | 2.5 $\pm$ 0.6             |
| FADX <sub>6</sub> mut-D115E | 6.1 $\pm$ 0.2 | 3.5 $\pm$ 0.3 | 72.3 $\pm$ 1.3 | 1.2 $\pm$ 0.1 | 5.6 $\pm$ 0.3 | 1.8 $\pm$ 0.2 | 1.4 $\pm$ 0.1 | 1 $\pm$ 0.1   | 1.1 $\pm$ 0.2 | 4.6 $\pm$ 0.3              | 0.5 $\pm$ 0.1             | 6.2 $\pm$ 0.3             |
| G111A                       | 6.1 $\pm$ 0.1 | 3.3 $\pm$ 0.1 | 77.6 $\pm$ 1.0 | 2.4 $\pm$ 0.5 | 3.1 $\pm$ 0.5 | 1.8 $\pm$ 0.3 | 1.2 $\pm$ 0.1 | 1.0 $\pm$ 0.1 | 0             | 2.4 $\pm$ 0.6              | 0.8 $\pm$ 0               | 3.2 $\pm$ 0.6             |
| G111V                       | 4.3 $\pm$ 0.3 | 4.0 $\pm$ 0.5 | 67.6 $\pm$ 6.5 | 1.9 $\pm$ 0.5 | 5.6 $\pm$ 0.4 | 1.3 $\pm$ 0.3 | 2.0 $\pm$ 0.6 | 1.3 $\pm$ 0.3 | 2.2 $\pm$ 0.5 | 8.4 $\pm$ 1.6              | 1.0 $\pm$ 0.5             | 11.6 $\pm$ 2.5            |
| G111L                       | 5.8 $\pm$ 0.6 | 3.0 $\pm$ 0.5 | 83.1 $\pm$ 1.8 | 1.6 $\pm$ 0.4 | 1.7 $\pm$ 0.4 | 1.7 $\pm$ 0.2 | 1.1 $\pm$ 0.1 | 0.8 $\pm$ 0.1 | 0             | 0.5 $\pm$ 0.2              | 0.1 $\pm$ 0.1             | 0.6 $\pm$ 0.3             |
| G111F                       | 6.7 $\pm$ 0.5 | 2.9 $\pm$ 0.3 | 84.7 $\pm$ 1.0 | 0.3 $\pm$ 0.3 | 0.8 $\pm$ 0.3 | 2.0 $\pm$ 0.5 | 1.0 $\pm$ 0.2 | 0.8 $\pm$ 0.2 | 0             | 0.1 $\pm$ 0.1              | 0                         | 0                         |
| D115E                       | 6.3 $\pm$ 0.3 | 3.3 $\pm$ 0.9 | 78.2 $\pm$ 2.7 | 2.7 $\pm$ 0.5 | 3.3 $\pm$ 2.1 | 1.8 $\pm$ 0.4 | 1.0 $\pm$ 0.8 | 0.6 $\pm$ 0.5 | 0             | 1.2 $\pm$ 0.5              | 0                         | 1.2 $\pm$ 0.5             |
| G111A/D115E                 | 5.8 $\pm$ 0.2 | 4.1 $\pm$ 0.2 | 78.1 $\pm$ 1.2 | 1.5 $\pm$ 0   | 3.2 $\pm$ 0.2 | 1.0 $\pm$ 0.1 | 1.5 $\pm$ 0.1 | 1.1 $\pm$ 0.1 | 0             | 3.2 $\pm$ 0.8              | 0.4 $\pm$ 0.2             | 3.6 $\pm$ 1.0             |
| G111V/D115E                 | 5.7 $\pm$ 0.6 | 3.5 $\pm$ 1.0 | 67.3 $\pm$ 3.5 | 1.3 $\pm$ 1.1 | 6.4 $\pm$ 0.6 | 1.8 $\pm$ 0.2 | 1.8 $\pm$ 1.3 | 1.3 $\pm$ 0.5 | 5.8 $\pm$ 0.3 | 4.2 $\pm$ 0.3              | 0.8 $\pm$ 0.4             | 10.8 $\pm$ 0.7            |
| G111L/D115E                 | 6.3 $\pm$ 0.2 | 3.4 $\pm$ 0.2 | 83.1 $\pm$ 1.5 | 1.3 $\pm$ 0.6 | 1.6 $\pm$ 0.4 | 1.7 $\pm$ 0.3 | 1.3 $\pm$ 0.1 | 1.1 $\pm$ 0.3 | 0             | 0.2 $\pm$ 0.1              | 0                         | 0.2 $\pm$ 0.1             |
| G111F/D115E                 | 6.3 $\pm$ 0.8 | 4.8 $\pm$ 2.5 | 84.5 $\pm$ 1.1 | 0.6 $\pm$ 0.2 | 0.3 $\pm$ 0.2 | 0.8 $\pm$ 0.4 | 1.2 $\pm$ 0.3 | 0.8 $\pm$ 0.3 | 0             | 0.1 $\pm$ 0.1              | 0                         | 0.1 $\pm$ 0.1             |

<sup>a</sup>Eleostearic acid
